# Supplementary material for: FIH Is an Oxygen Sensor in Ovarian Cancer for G9a/GLP-Driven Epigenetic Regulation of Metastasis-Related Genes
Source: Oxford University Press journal article supplement (doi:10.1158/0008-5472.can-17-2506), 2017-12-19
Supplement: 00085472can172506-sup-188012_2_supp_4448295_p0w6vz.pdf [file 00085472can172506-sup-188012_2_supp_4448295_p0w6vz.pdf]

A

Histone H3 modification

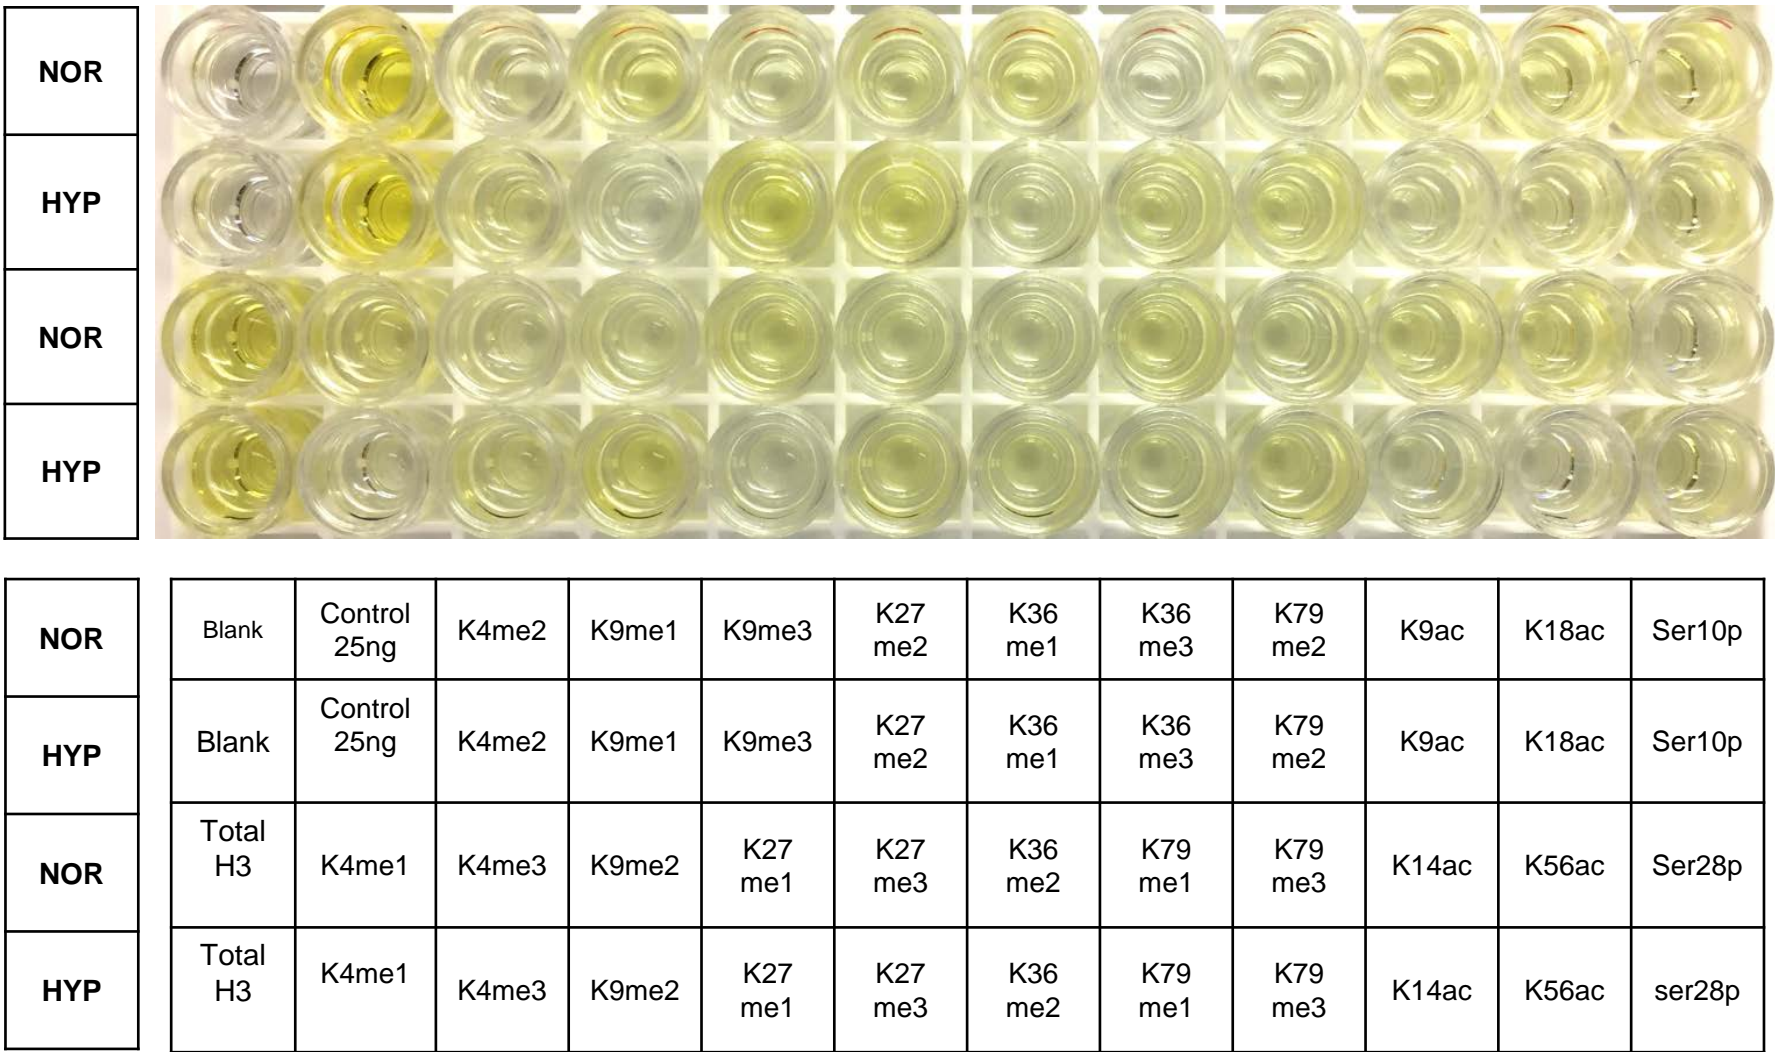

B

H4 modification

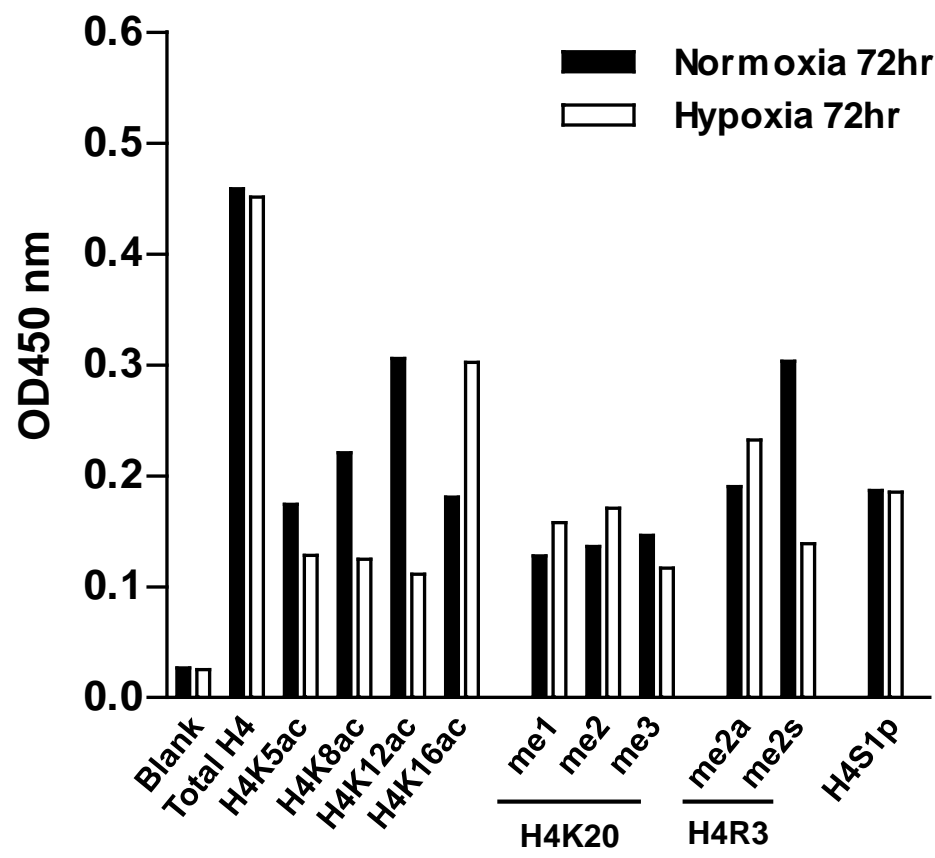

H4 modification

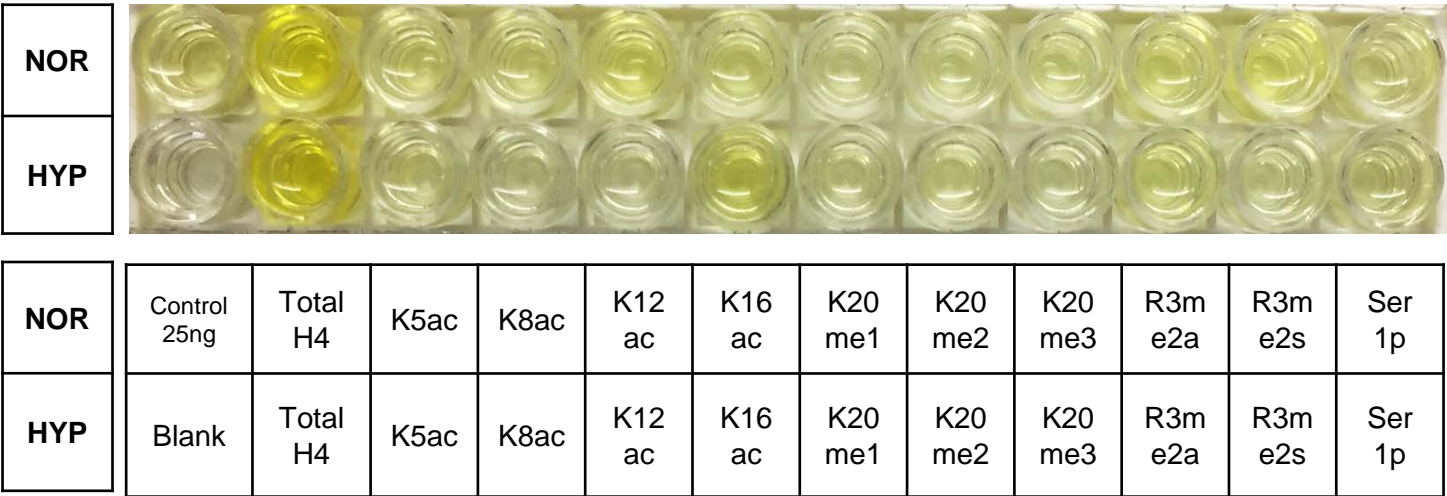

Fig. S1. Screening for histone H3 and H4 modifications

**A**, Representative photograph of microplate for H3 modification assay. H3 modifications were measured using the EpiQuik H3 Modification Multiplex Assay Kit. Histone extract (25 ng of protein) was used per well and experiments were performed according to manufacturers’ protocol. **B**, H4 modifications were measured using EpiQuik H4 Modification Multiplex Assay Kit. Histone extracts were prepared from HEK293 cells which were incubated under normoxia (NOR) or hypoxia (HYP) for 72 hr. Histone extract (200 ng of protein) was used per well and experiments were performed according to manufacturers’ protocol. Representative photograph of microplate for H4 modification assay (Left). Bar graph represents mean value of OD450 for indicated modification (Right). Two independent assays were performed.

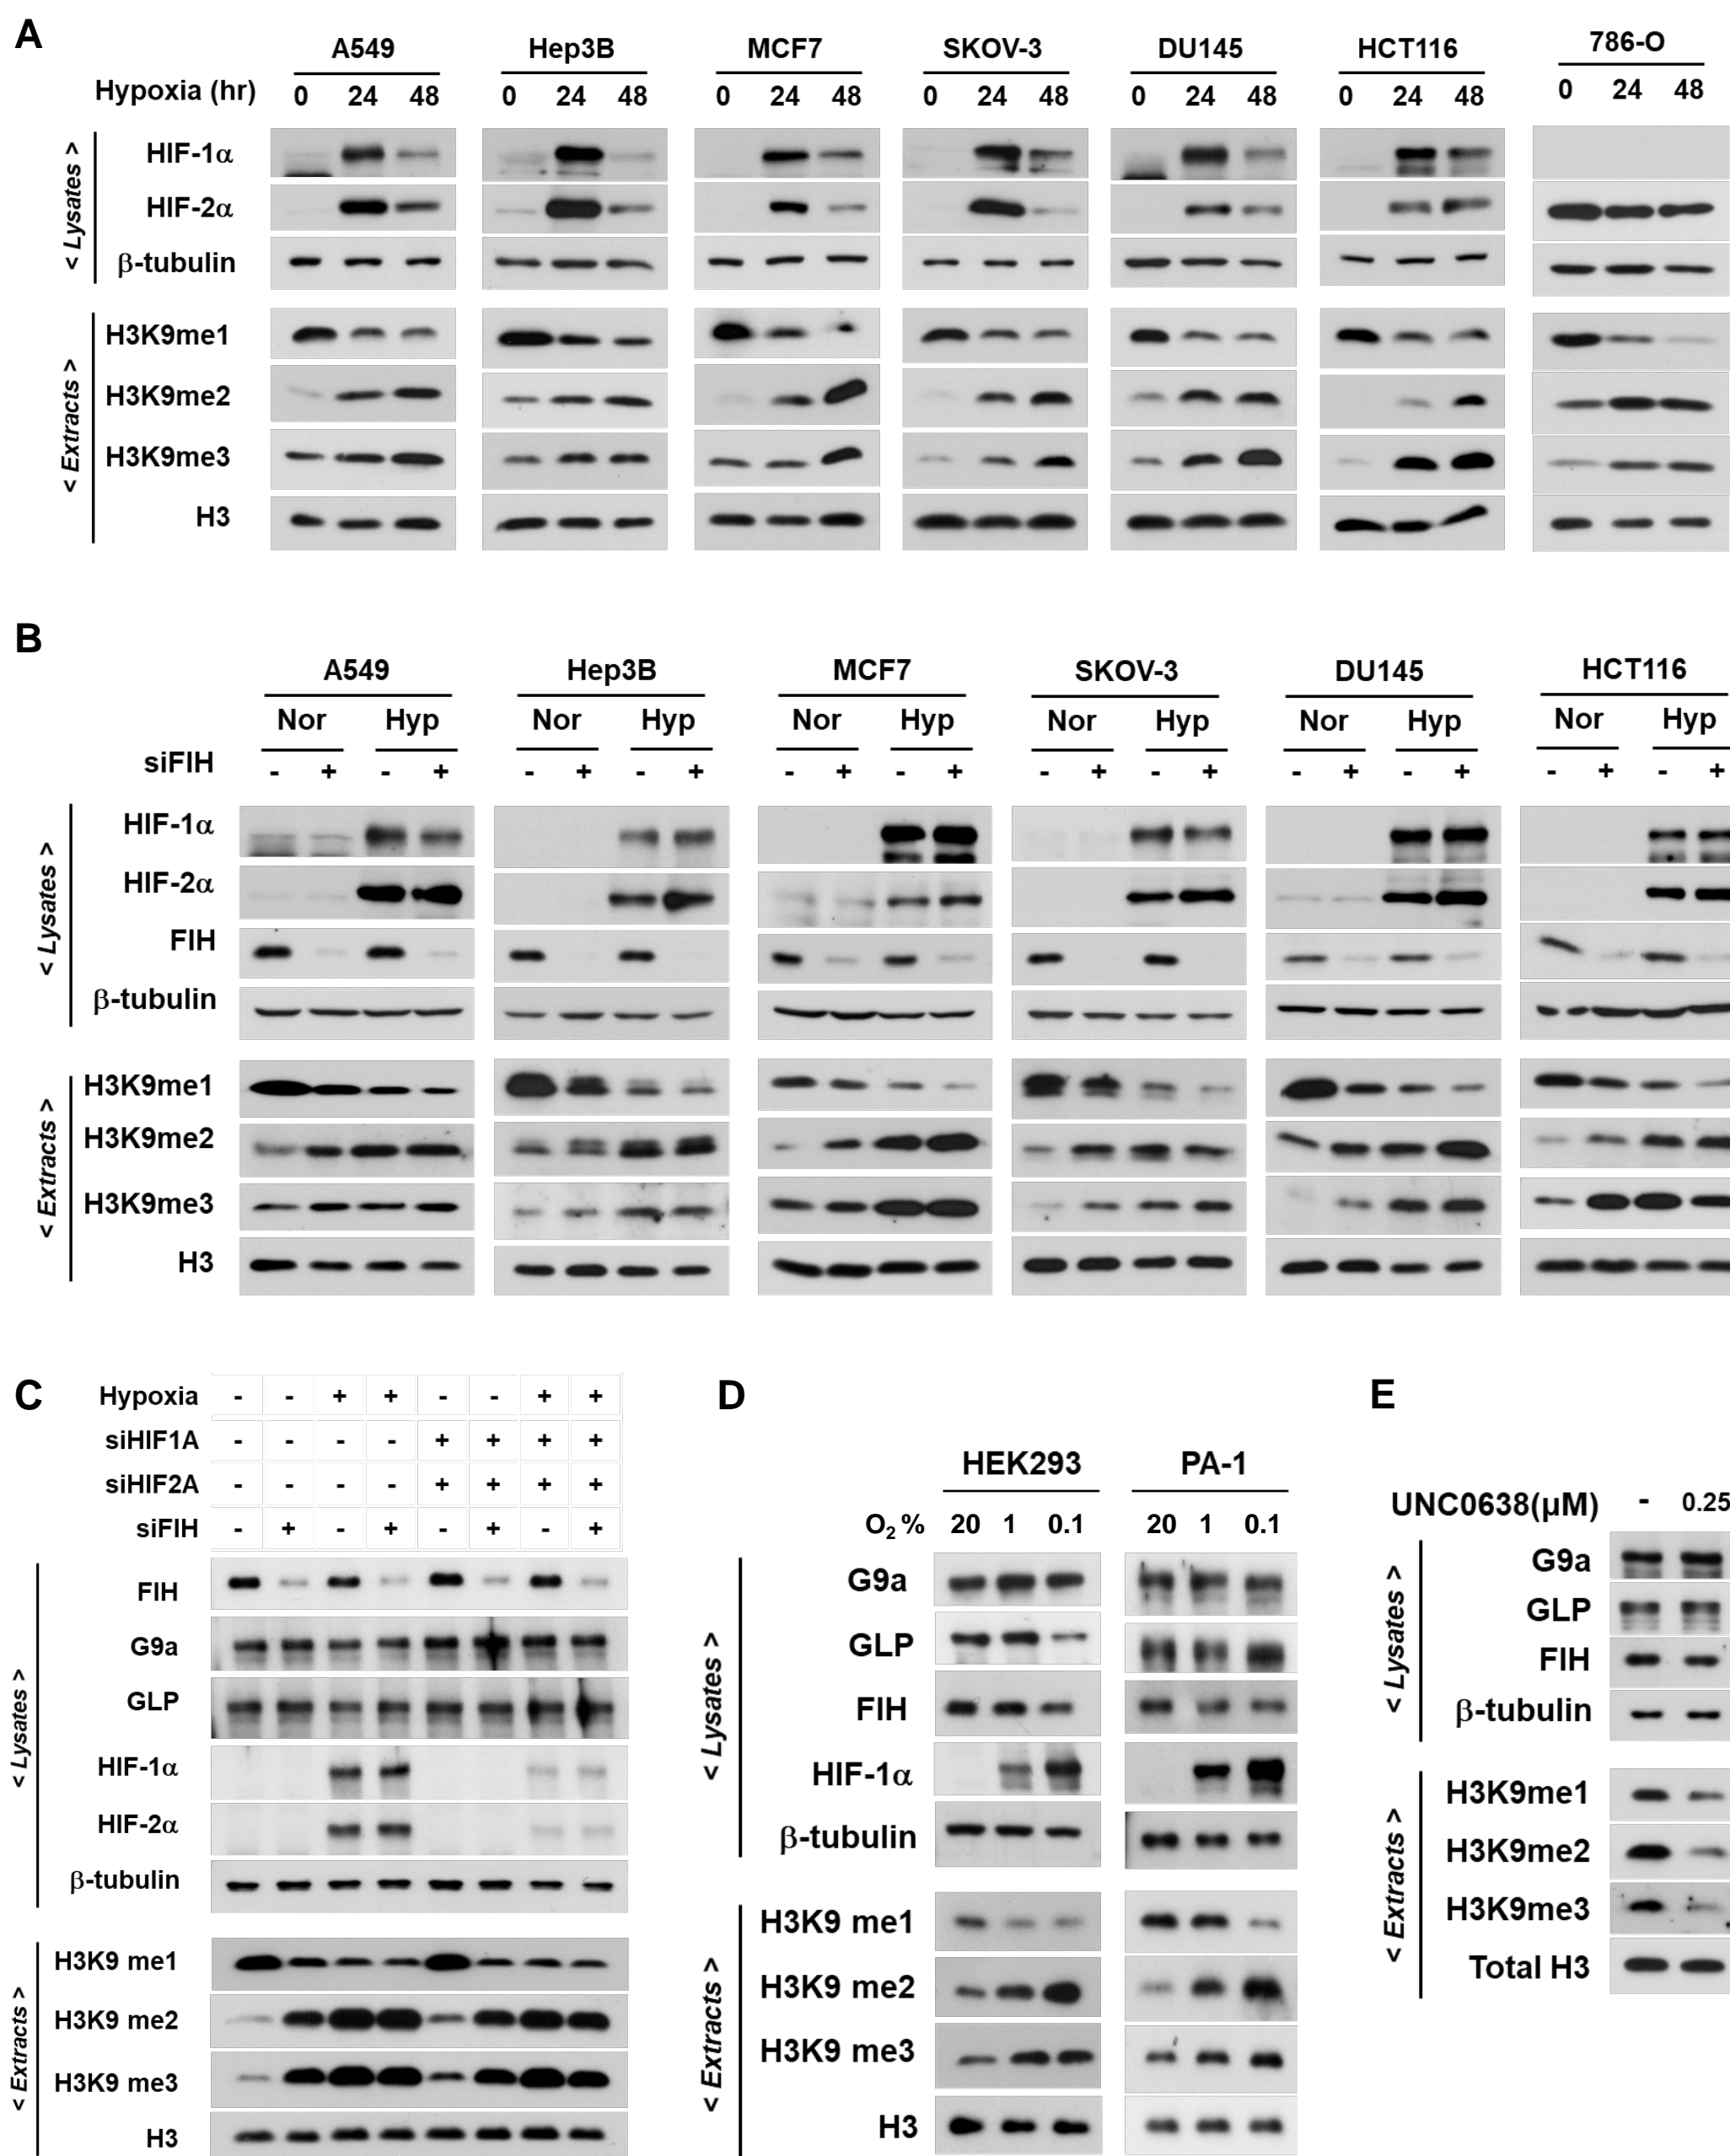

**Fig. S2. FIH inactivates G9a and GLP O<sub>2</sub>-dependently**

**A**, Various cell lines (A549, Hep3B, MCF7, SKOV-3, DU145, HCT116, and 786-O) were incubated under normoxia or hypoxia for 24 or 48 hr, and the status of histone H3K9 methylation was analyzed by immunoblotting. **B**, Various cell lines were transfected with a FIH-silencing siRNA and incubated under normoxia or hypoxia for 24 hr. Cell lysates and histone extracts were subjected to immunoblotting. **C**, HIF-1 $\alpha$  and HIF-2 $\alpha$  both were knocked down in HEK293 cells with or without FIH knockdown, and incubated under normoxia or hypoxia for 24 hr. H3K9 methylation status was measured by immunoblotting. **D**, HEK293 and PA-1 cells were incubated under 20%, 1%, or ~0.1% O<sub>2</sub> for 24 hr. Cell lysates and histone extracts were subjected to immunoblotting. **E**, HEK293 cells were treated with UNC0638 at the indicated concentrations for 48 hr. Histones were extracted and methylation levels of H3K9 were measured by immunoblotting.
